# Supplementary material for: The Administration of the Synbiotic Lactobacillus bulgaricus 6c3 Strain, Inulin and Fructooligosaccharide Decreases the Concentrations of Indoxyl Sulfate and Kidney Damage in a Rat Model
Source: PubMed Central journal article supplement (PMC7999732; doi:10.3390/toxins13030192), 2021-03-07
Supplement: toxins-13-00192-s001.pdf [file toxins-13-00192-s001.pdf]

## Supplementary Materials: The Administration of the Synbiotic *Lactobacillus bulgaricus* 6c3 Strain, Inulin and Fructooligosaccharide Decreases the Concentrations of Indoxyl Sulfate and Kidney Damage in a Rat Model

Alonso Jerez-Morales, José S. Merino, Sindy T. Díaz-Castillo, Carlos T. Smith, Jorge Fuentealba, Humberto Bernasconi, Gerson Echeverría and Apolinaria García-Cancino

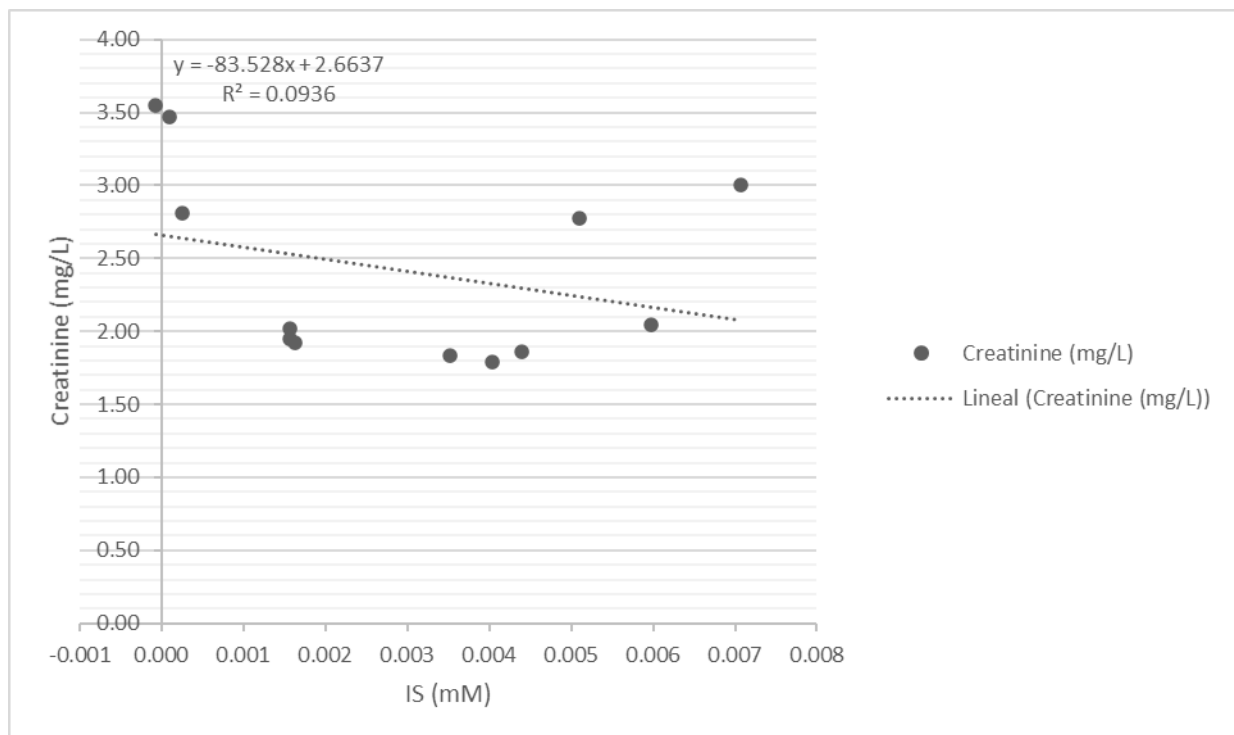

**Figure S1.** Correlation between creatinine and indoxyl sulfate (IS) levels of the control group.

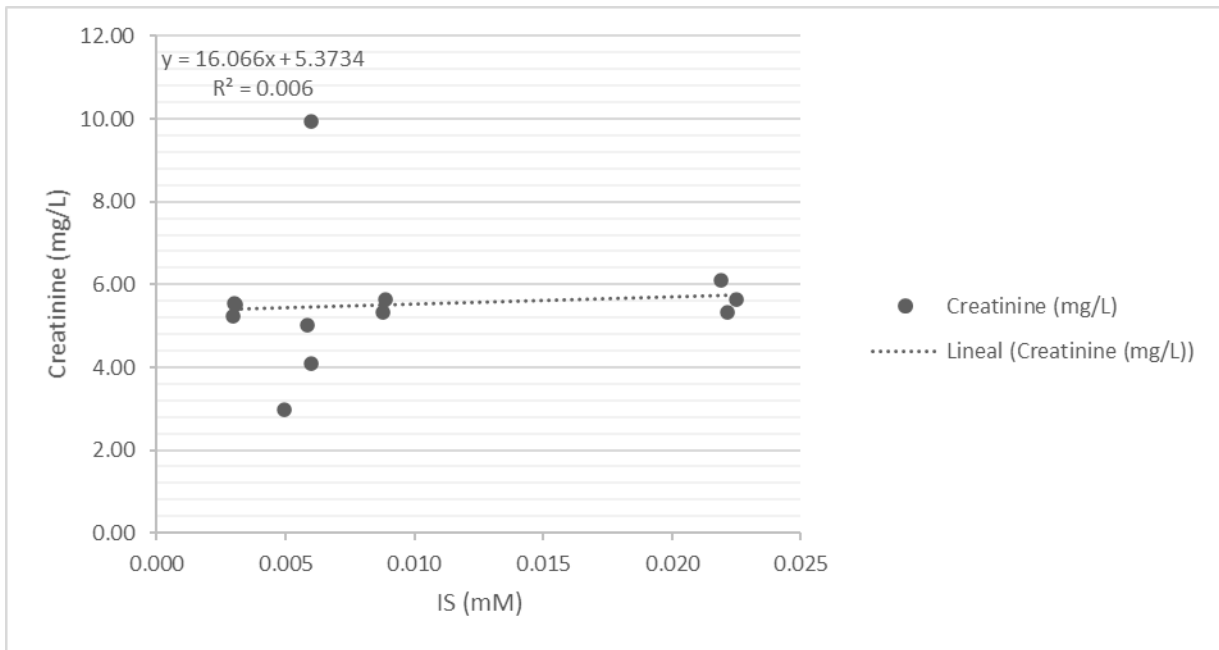

**Figure S2.** Correlation between creatinine and indoxyl sulfate (IS) levels of the Nef group.

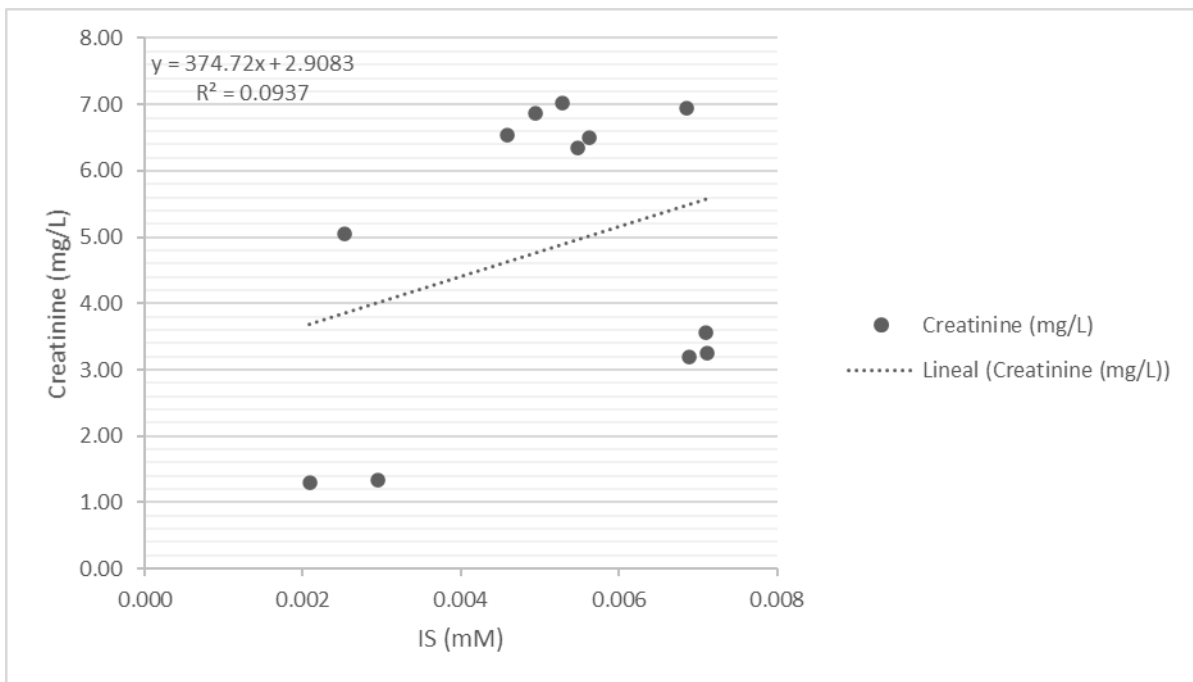

**Figure S3.** Correlation between creatinine and indoxyl sulfate (IS) levels of the Lac group.
